# Supplementary material for: Distributions of Invasive Arthropods across Heterogeneous Urban Landscapes in Southern California: Aridity as a Key Component of Ecological Resistance
Source: PubMed Central journal article supplement (PMC6358729; doi:10.3390/insects10010029), 2019-01-15
Supplement: insects-10-00029-s001.pdf [file insects-10-00029-s001.pdf]

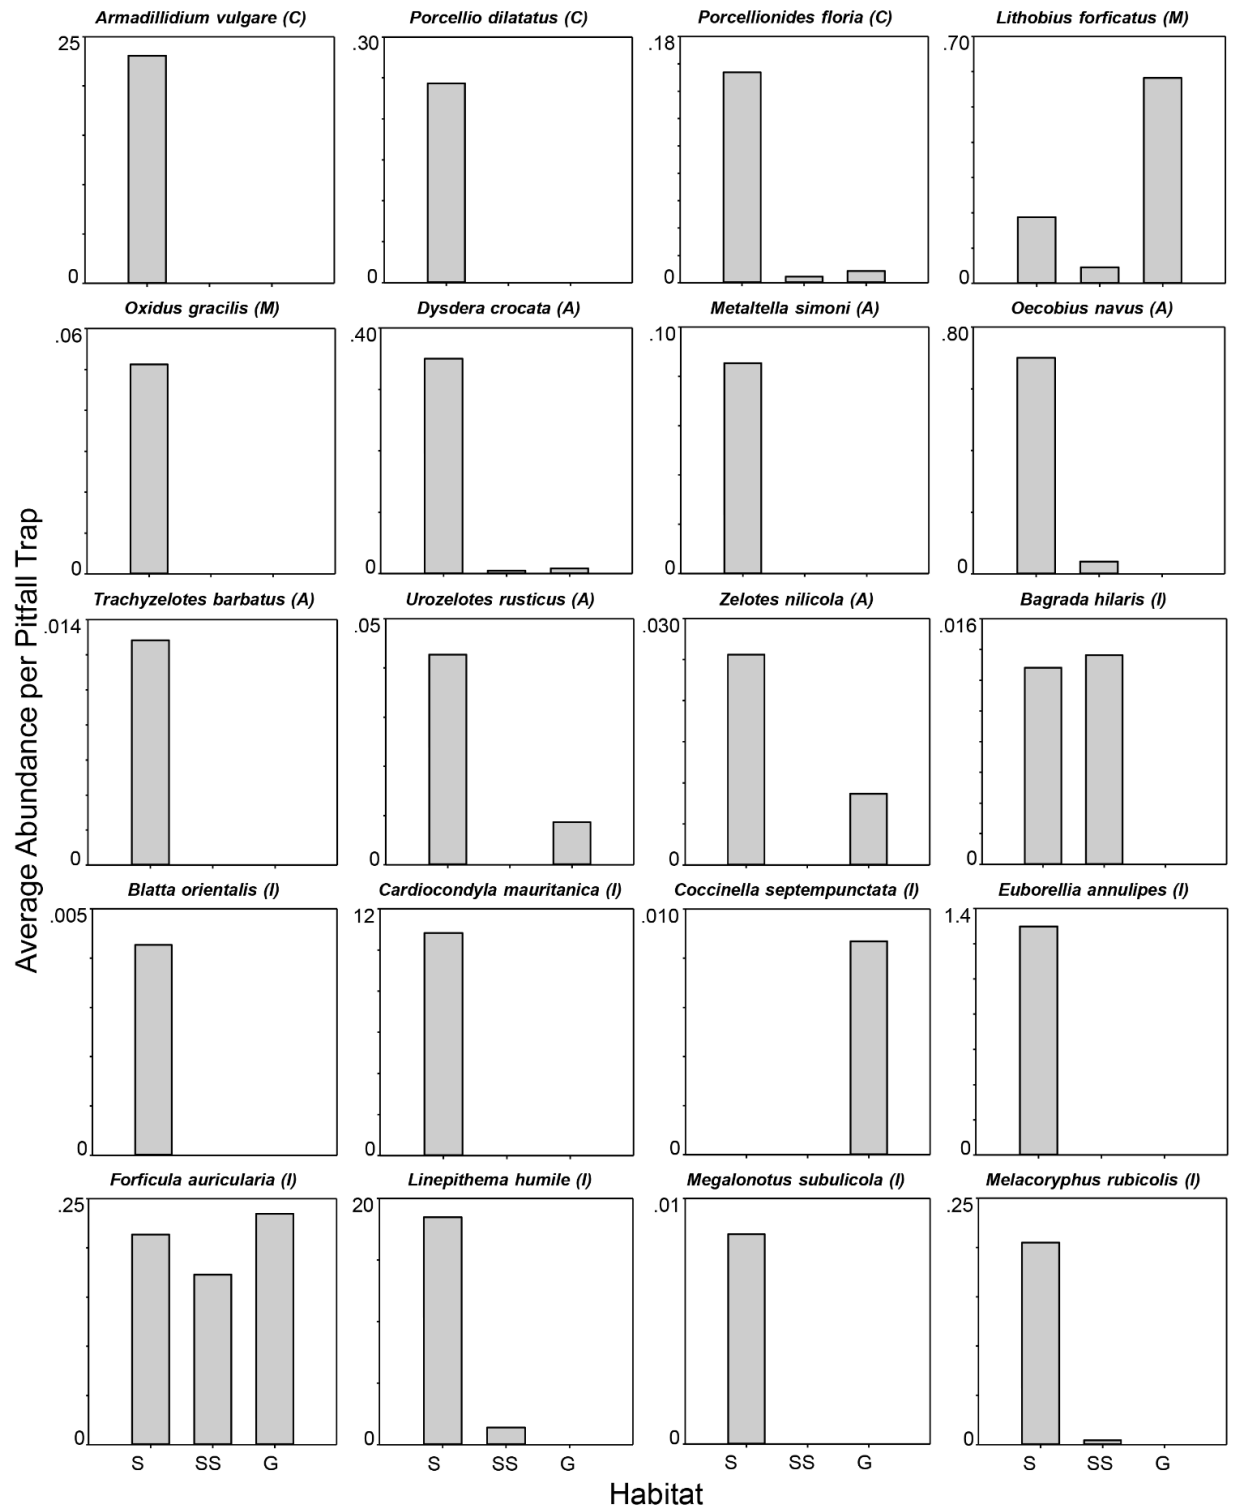

**Supplemental Figure 1.** Abundance of each non-native species. Bar height is the mean number of individuals per pitfall trap in each habitat type (S = Suburban; SS = Sage scrub; G = Grassland) over the five sampling periods. Letters next to species names indicate subphylum or class: C = Crustacea; M = Myriapoda; A = Arachnida; I = Insecta.
